# Supplementary material for: MiR-647 Targeting PRKCA to Regulate the Activation of Human Atrial Fibroblasts Through TGFβ1/Smad Pathway
Source: Research Square preprint supplement (doi:10.21203/rs.3.rs-1535469/v1), 2022-04-12
Supplement: Supplementary file 1 [file 6681c9d1d7447a7c85537afb.docx]

**Supplementary Figures**


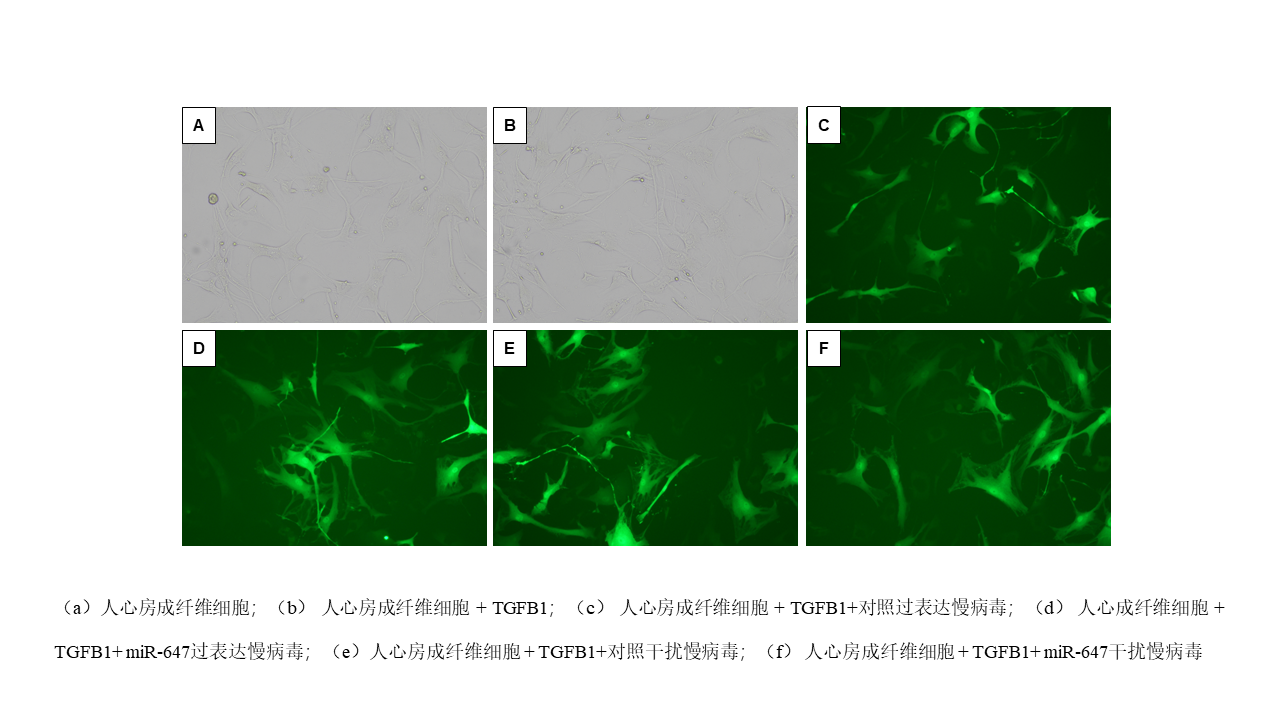


Supplementary Figure 1. Transfection of lentiviral particles of NC mimics, miR-647, inhibitor NC, or miR-647 inhibitor into the human atrial fibroblasts. (A) Control group, the human atrial fibroblasts, 100×. (B) The human atrial fibroblasts stimulated by TGFβ1, 100×. (C) The human atrial fibroblasts transfected with NC mimics and stimulated by TGFβ1, 100×. (D) The human atrial fibroblasts transfected with miR-647 and stimulated by TGFβ1, 100×. (E) The human atrial fibroblasts transfected with inhibitor NC and stimulated by TGFβ1, 100×. (F) The human atrial fibroblasts transfected with miR-647 inhibitor and stimulated by TGFβ1, 100×. The lentiviruses carried green fluorescence protein.


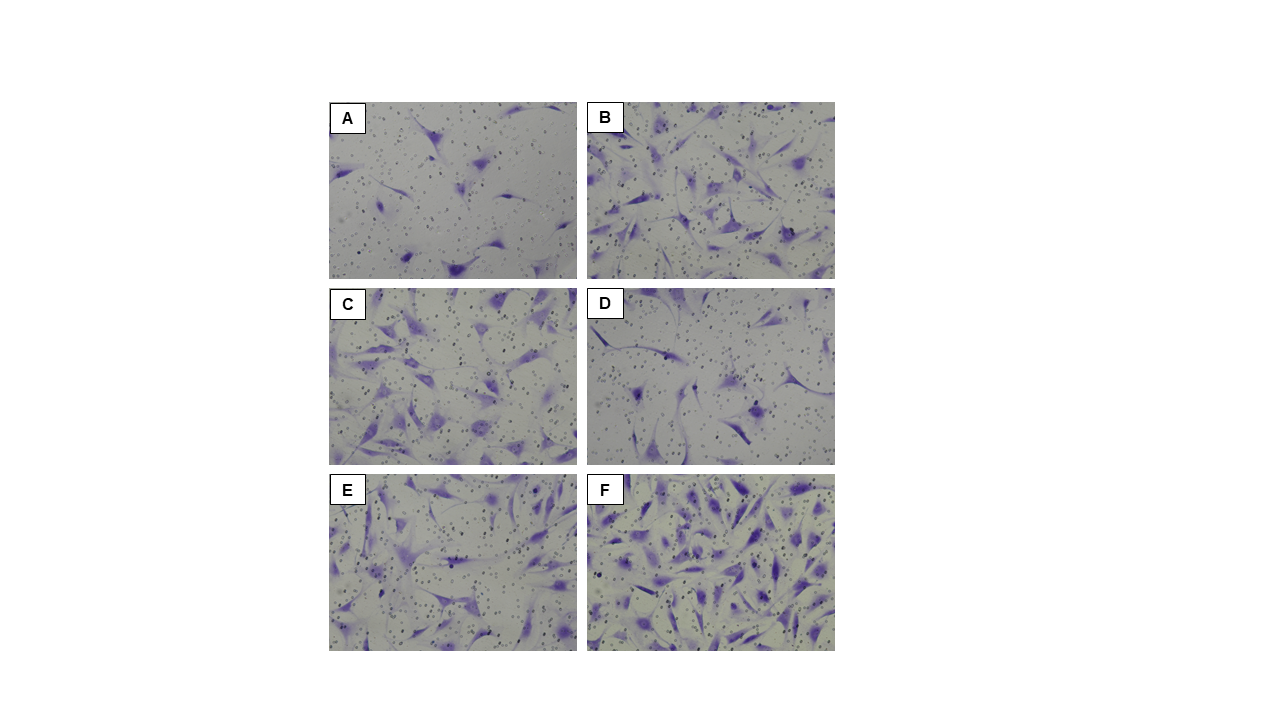


Supplementary Figure 2. Cell migration detected by transwell assay. (A) Control group, the human atrial fibroblasts, 100×. (B) The human atrial fibroblasts stimulated by TGFβ1, 100×. (C) The human atrial fibroblasts transfected with NC mimics and stimulated by TGFβ1, 100×. (D) The human atrial fibroblasts transfected with miR-647 and stimulated by TGFβ1, 100×. (E) The human atrial fibroblasts transfected with inhibitor NC and stimulated by TGFβ1, 100×. (F) The human atrial fibroblasts transfected with miR-647 inhibitor and stimulated by TGFβ1, 100×. The cells were stained with crystal violet.


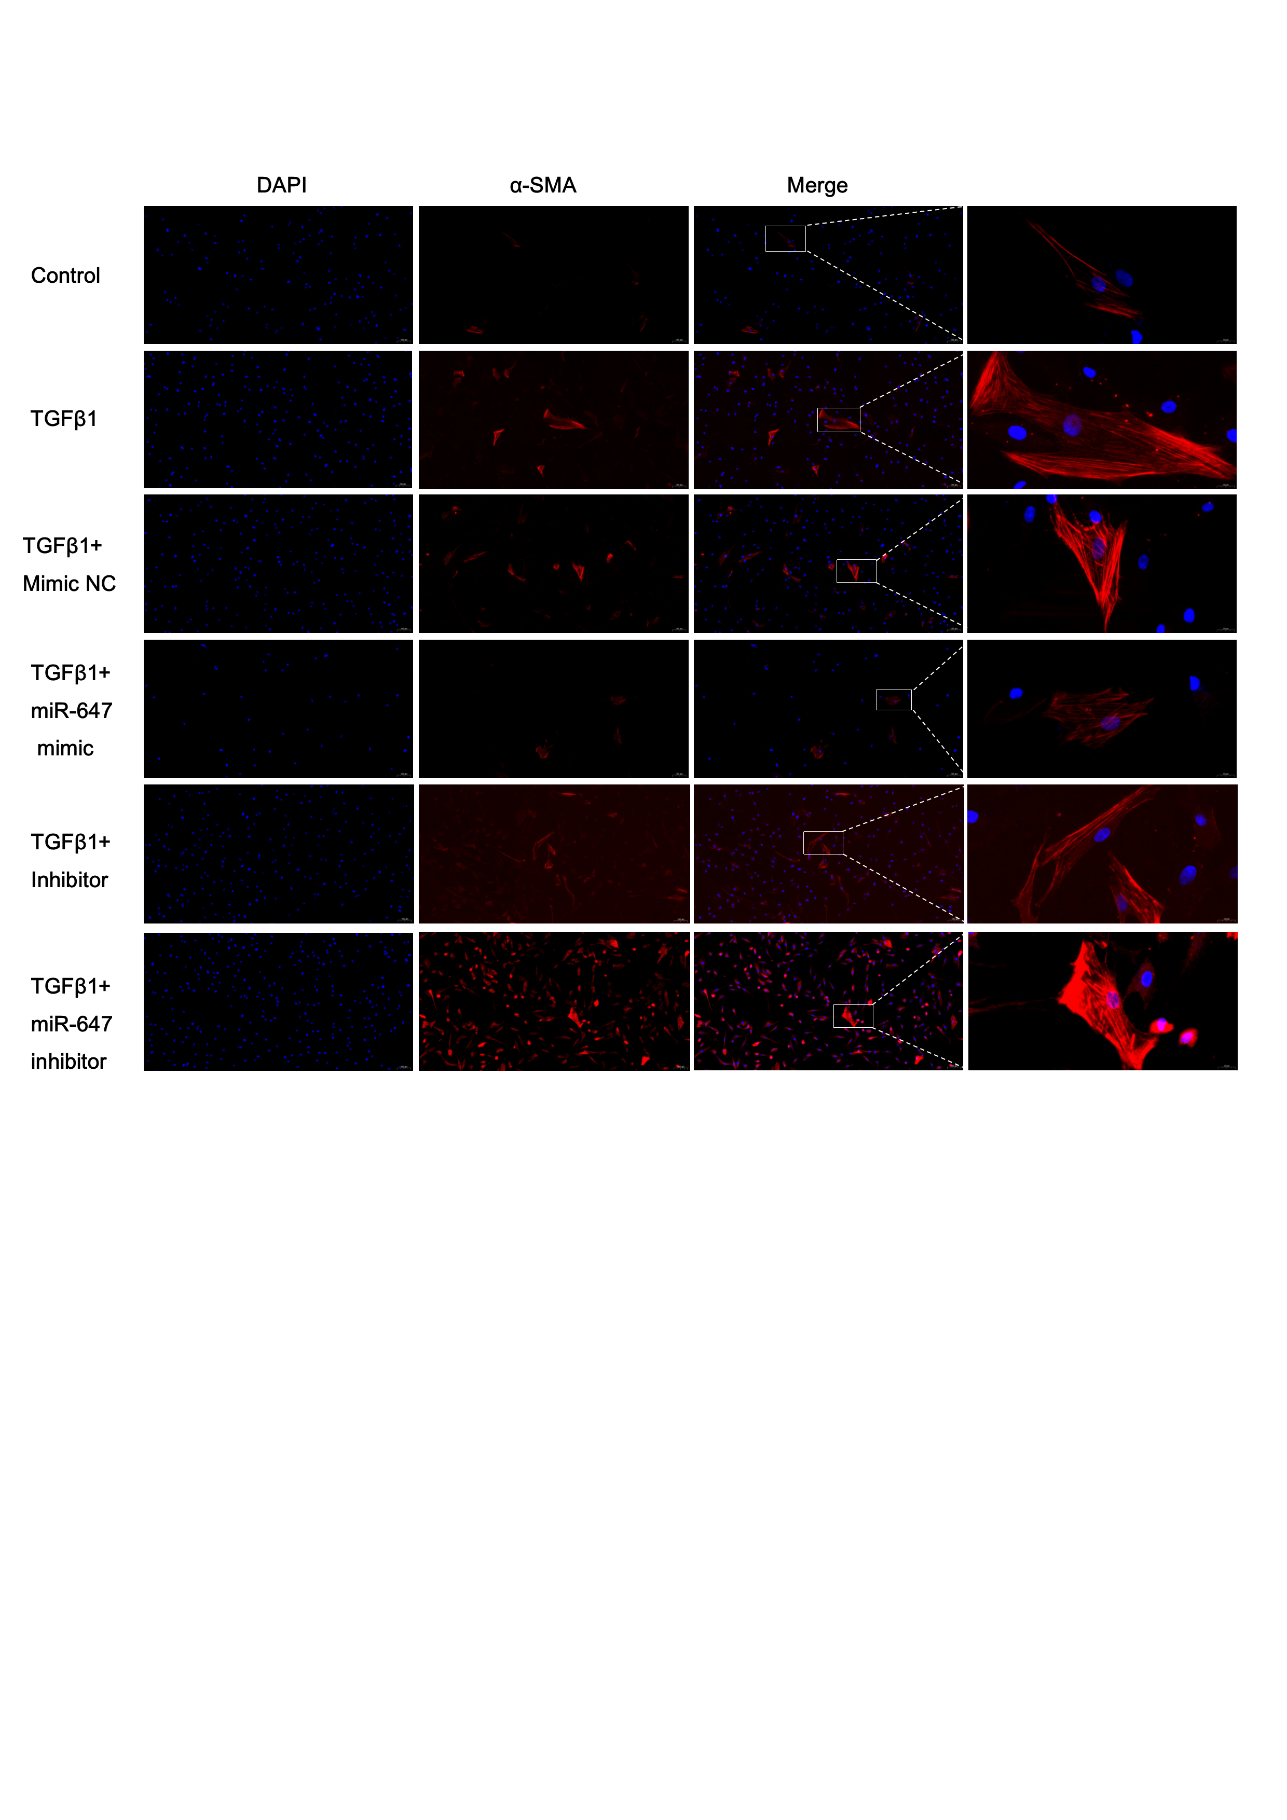


Supplementary Figure 3. Immunofluorescence staining of α-SMA (red) in human atrial fibroblasts. DAPI was used for nuclear counterstaining (blue). The first three columns were 10×, and the last column was 400×.


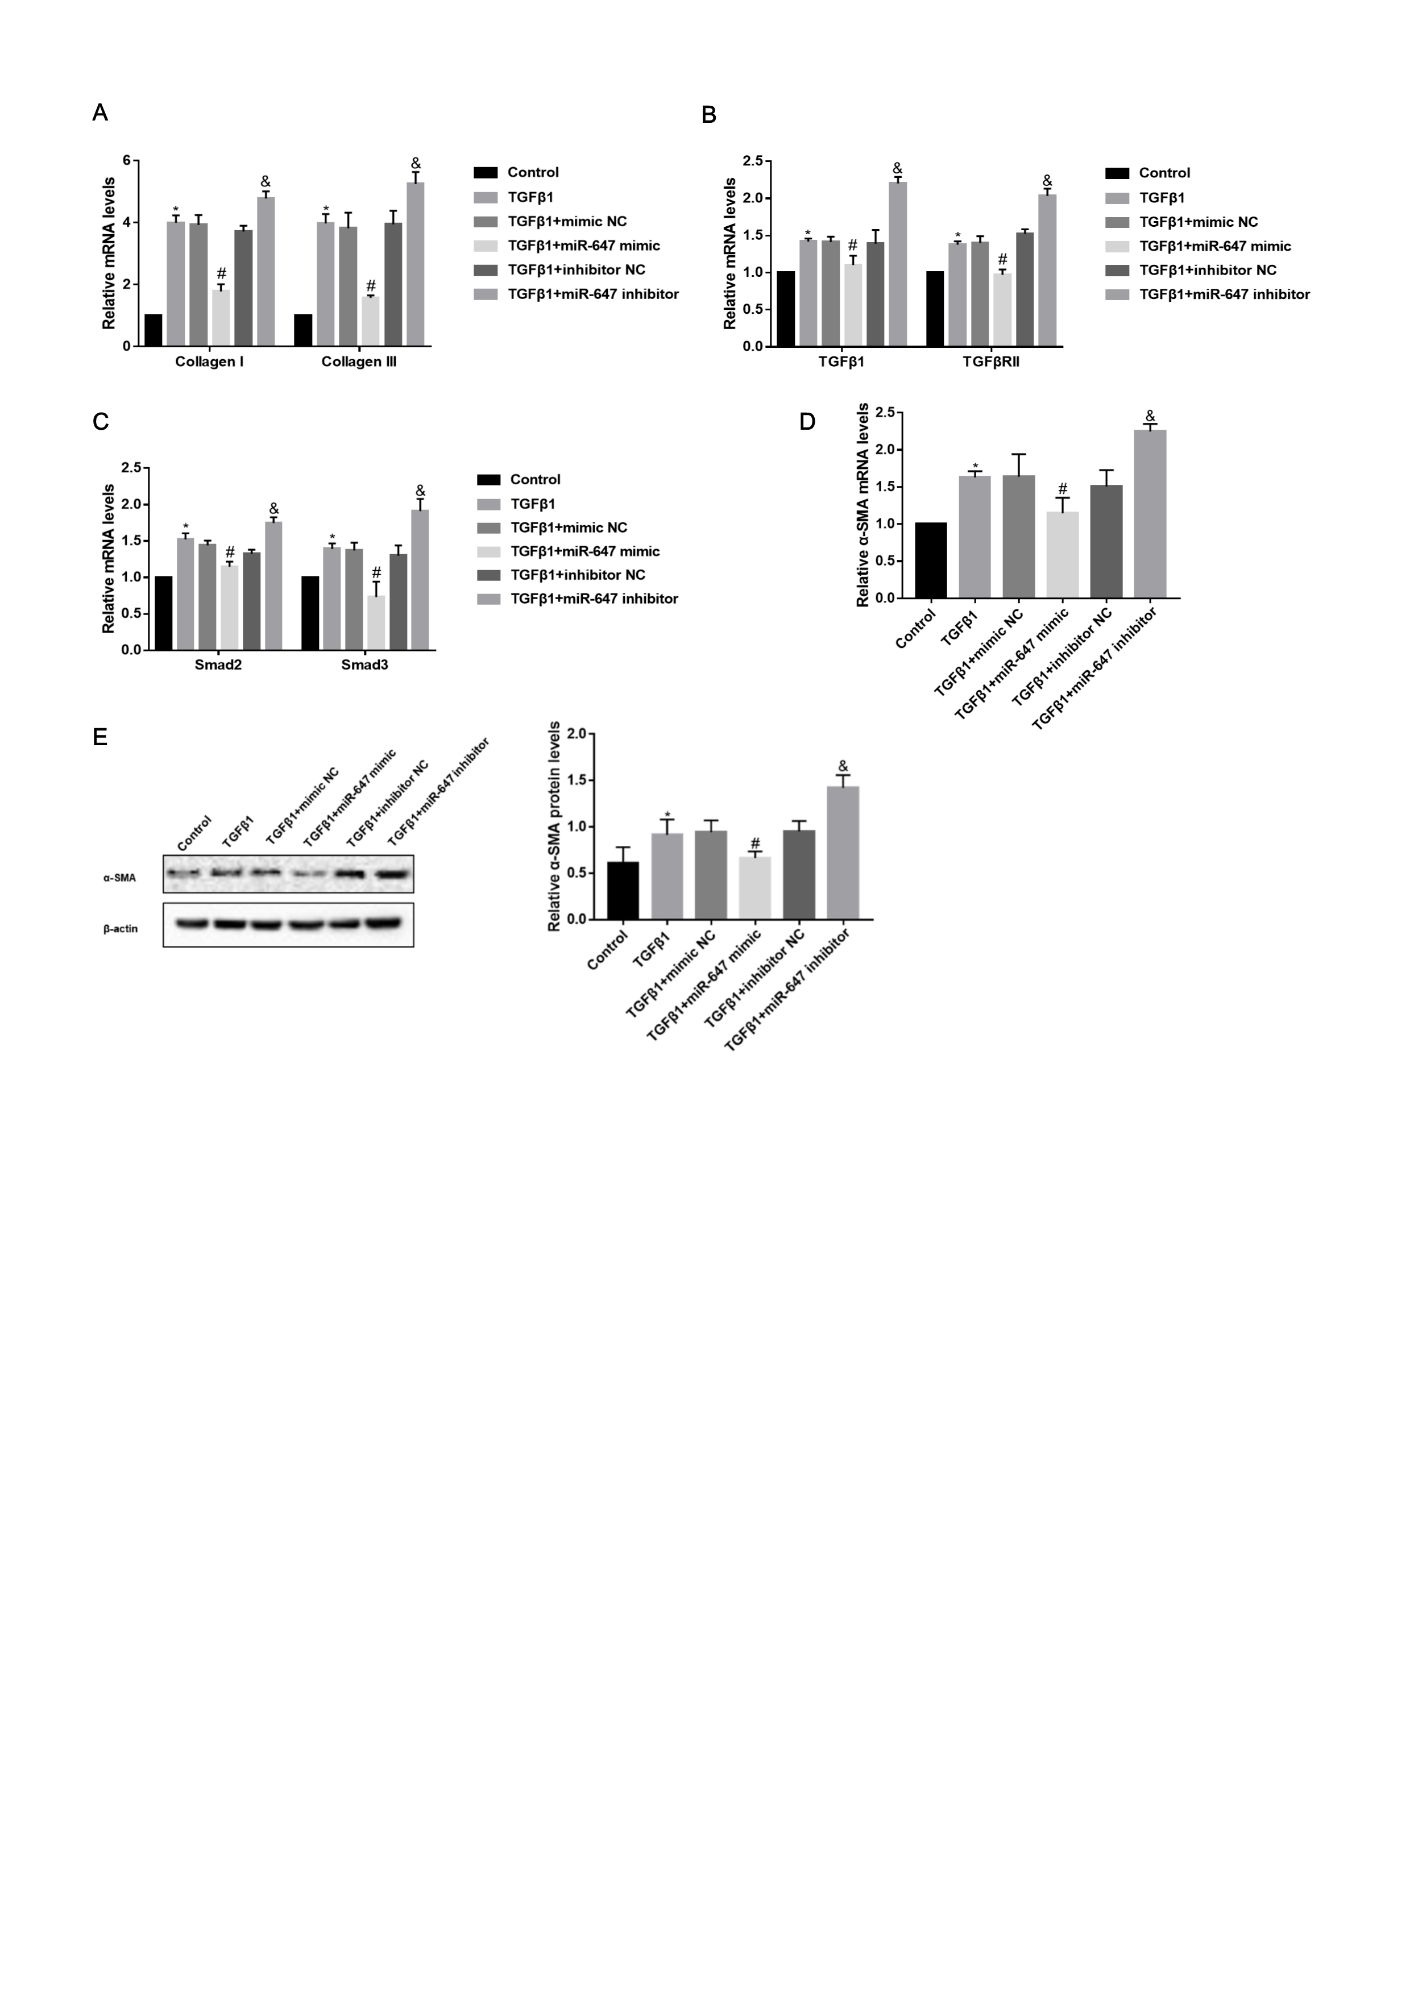


Supplementary Figure 4. Effects of miR-647 expression on the collagen production, TGFβ1/Smad signaling activation and α-SMA expression of TGFβ1-induced human atrial fibroblasts. (A) Results of the qPCR showed that miR-647 overexpression reduced the collagen production, whereas miR-647 knockdown exerted the opposite effects. (B, C) Results of the qPCR showed that miR-647 overexpression attenuated the activation of TGFβ1/Smad signaling pathway, whereas miR-647 knockdown exerted the opposite effects. (D, E) Results of the qPCR and WB showed that miR-647 overexpression reduced α-SMA expression, whereas miR-647 knockdown exerted the opposite effects. *P < 0.05 vs. control, #P < 0.05 vs. TGFβ1 + mimic NC, &P < 0.05 vs. TGFβ1 + inhibitor NC. Data were presented as mean ± SD.


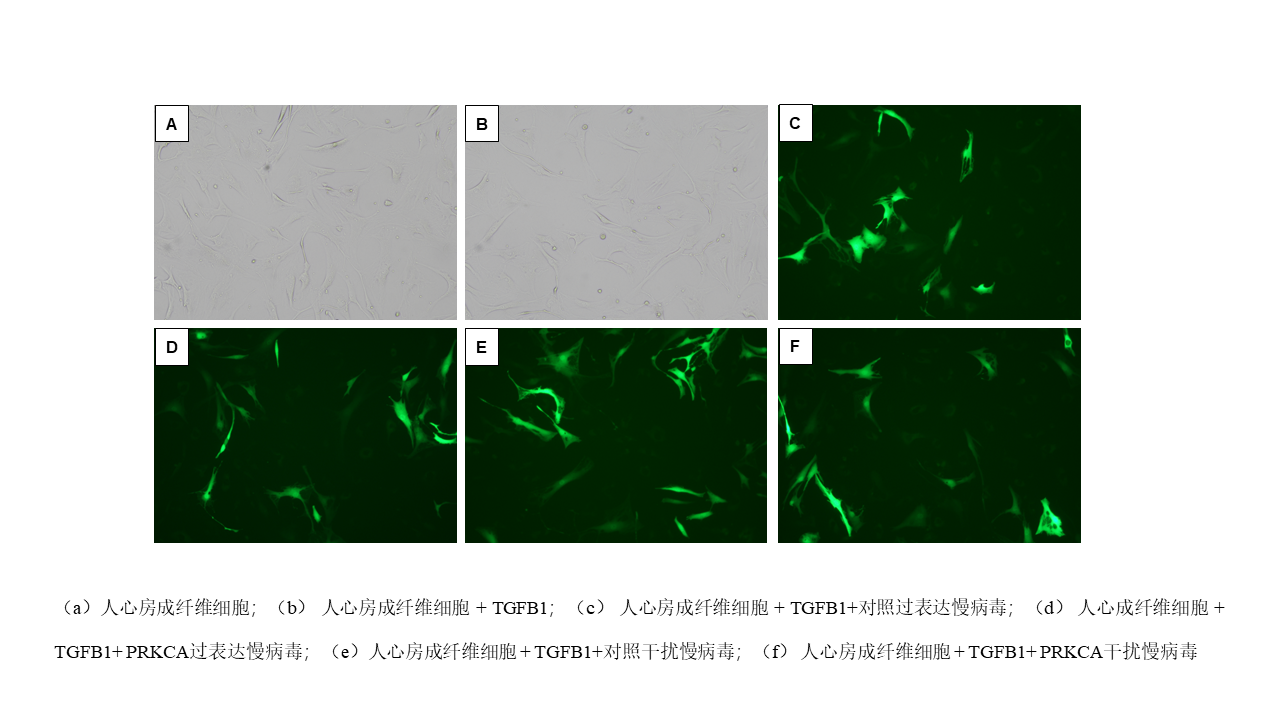

Supplementary Figure 5. Transfection of lentiviral particles of vector, PRKCA, si-ctrl, or si-PRKCA into the human atrial fibroblasts. (A) Control group, the human atrial fibroblasts, 100×. (B) The human atrial fibroblasts stimulated by TGFβ1, 100×. (C) The human atrial fibroblasts transfected with vector and stimulated by TGFβ1, 100×. (D) The human atrial fibroblasts transfected with PRKCA and stimulated by TGFβ1, 100×. (E) The human atrial fibroblasts transfected with si-ctrl and stimulated by TGFβ1, 100×. (F) The human atrial fibroblasts transfected with si-PRKCA and stimulated by TGFβ1, 100×. The lentiviruses carried green fluorescence protein.


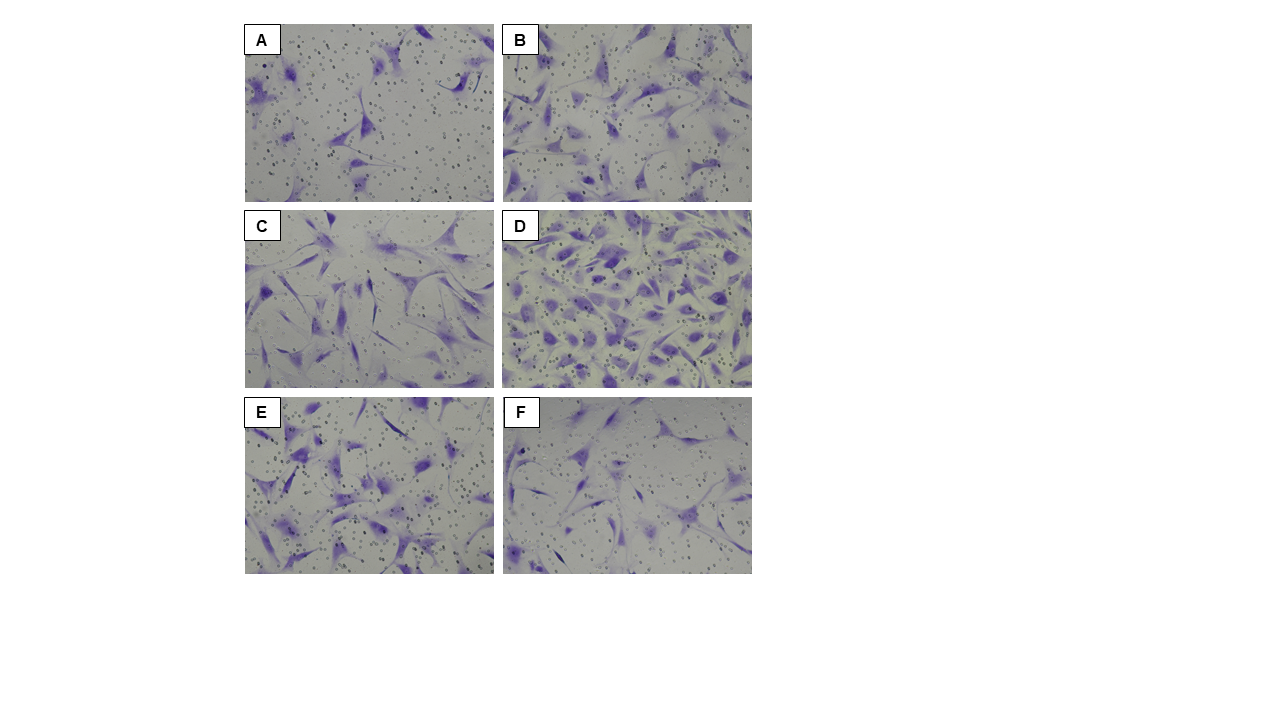


Supplementary Figure 6. Cell migration detected by transwell assay. (A) Control group, the human atrial fibroblasts, 100×. (B) The human atrial fibroblasts stimulated by TGFβ1, 100×. (C) The human atrial fibroblasts transfected with vector and stimulated by TGFβ1, 100×. (D) The human atrial fibroblasts transfected with PRKCA and stimulated by TGFβ1, 100×. (E) The human atrial fibroblasts transfected with si-ctrl and stimulated by TGFβ1, 100×. (F) The human atrial fibroblasts transfected with si-PRKCA and stimulated by TGFβ1, 100×. The cells were stained with crystal violet.


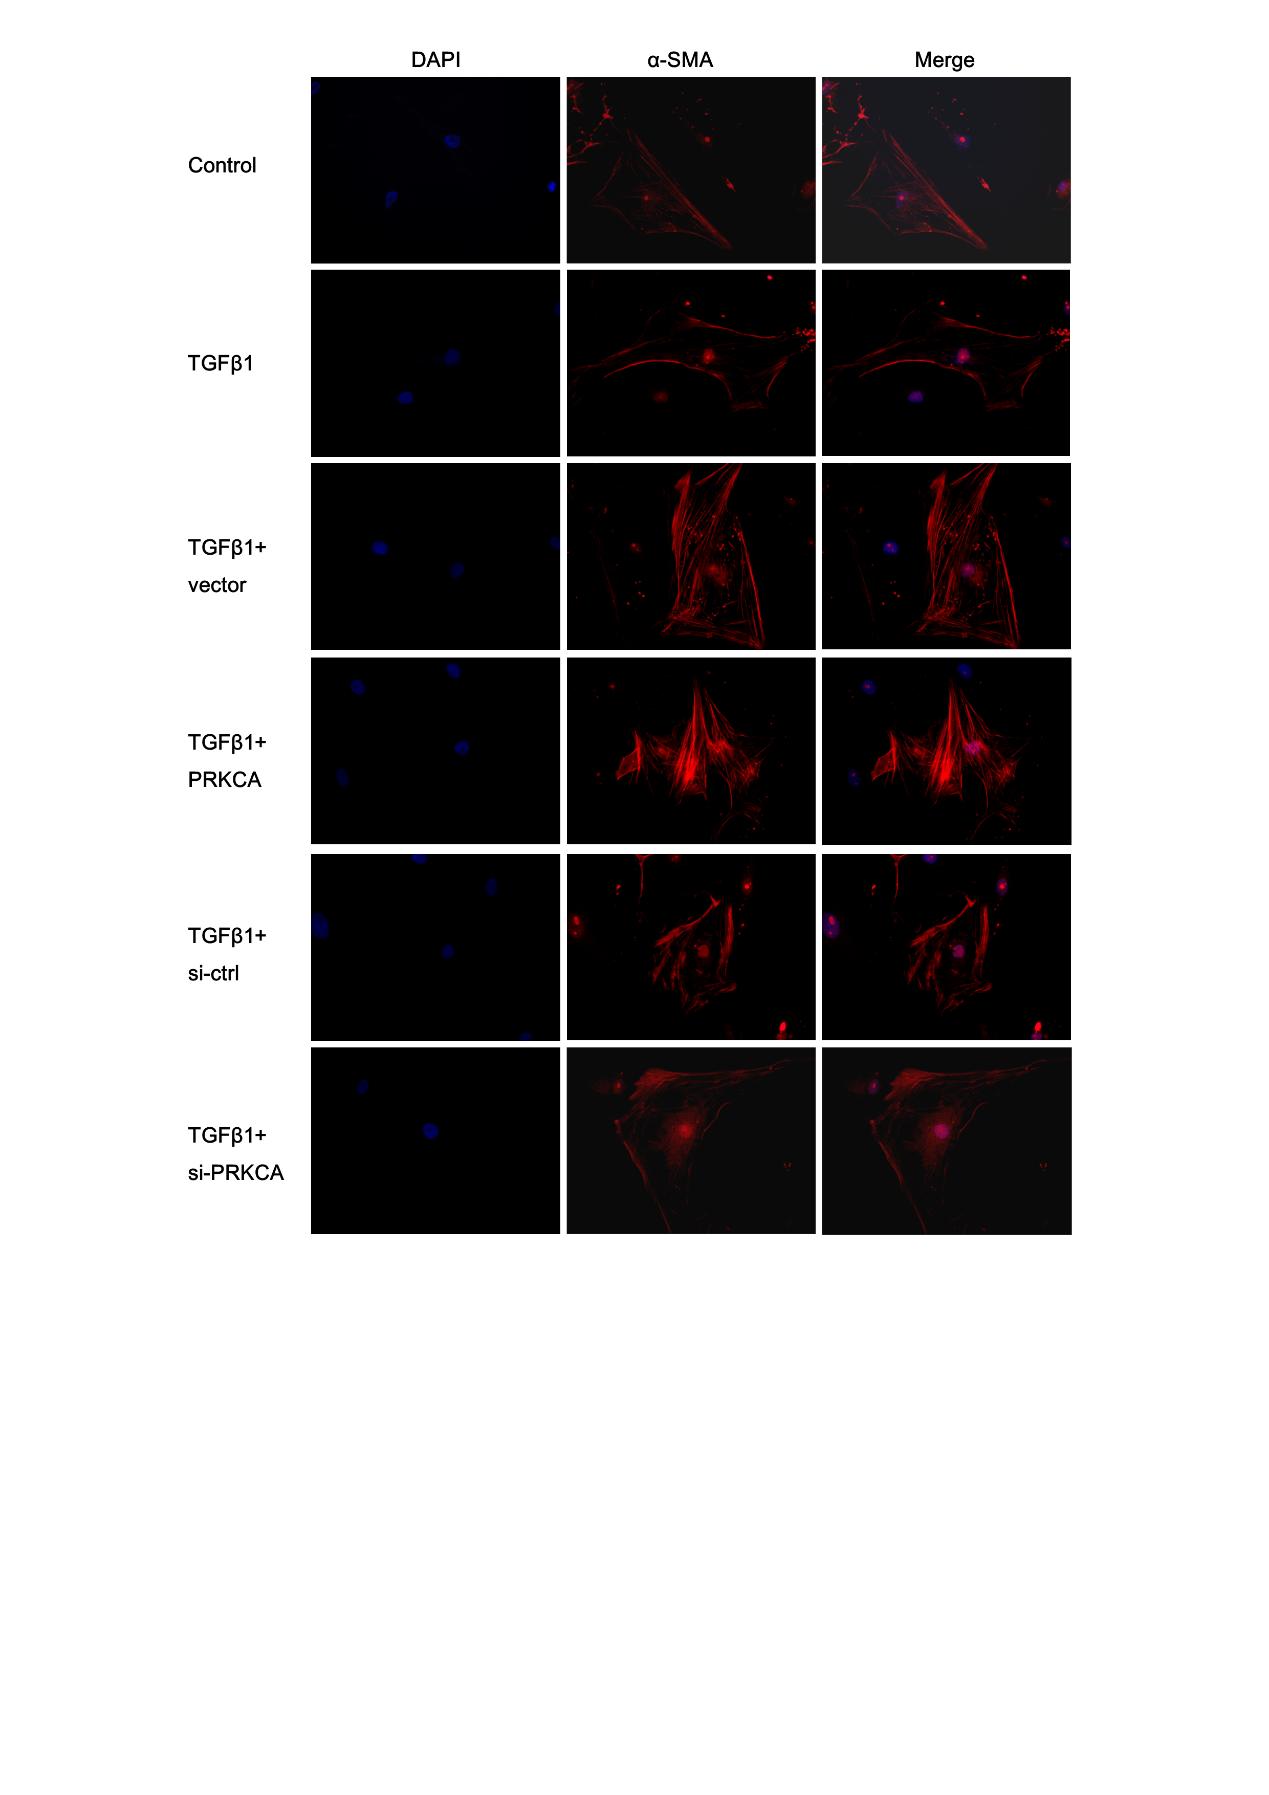


Supplementary Figure 7. Immunofluorescence staining of α-SMA (red) in human atrial fibroblasts, 400×. DAPI was used for nuclear counterstaining (blue).


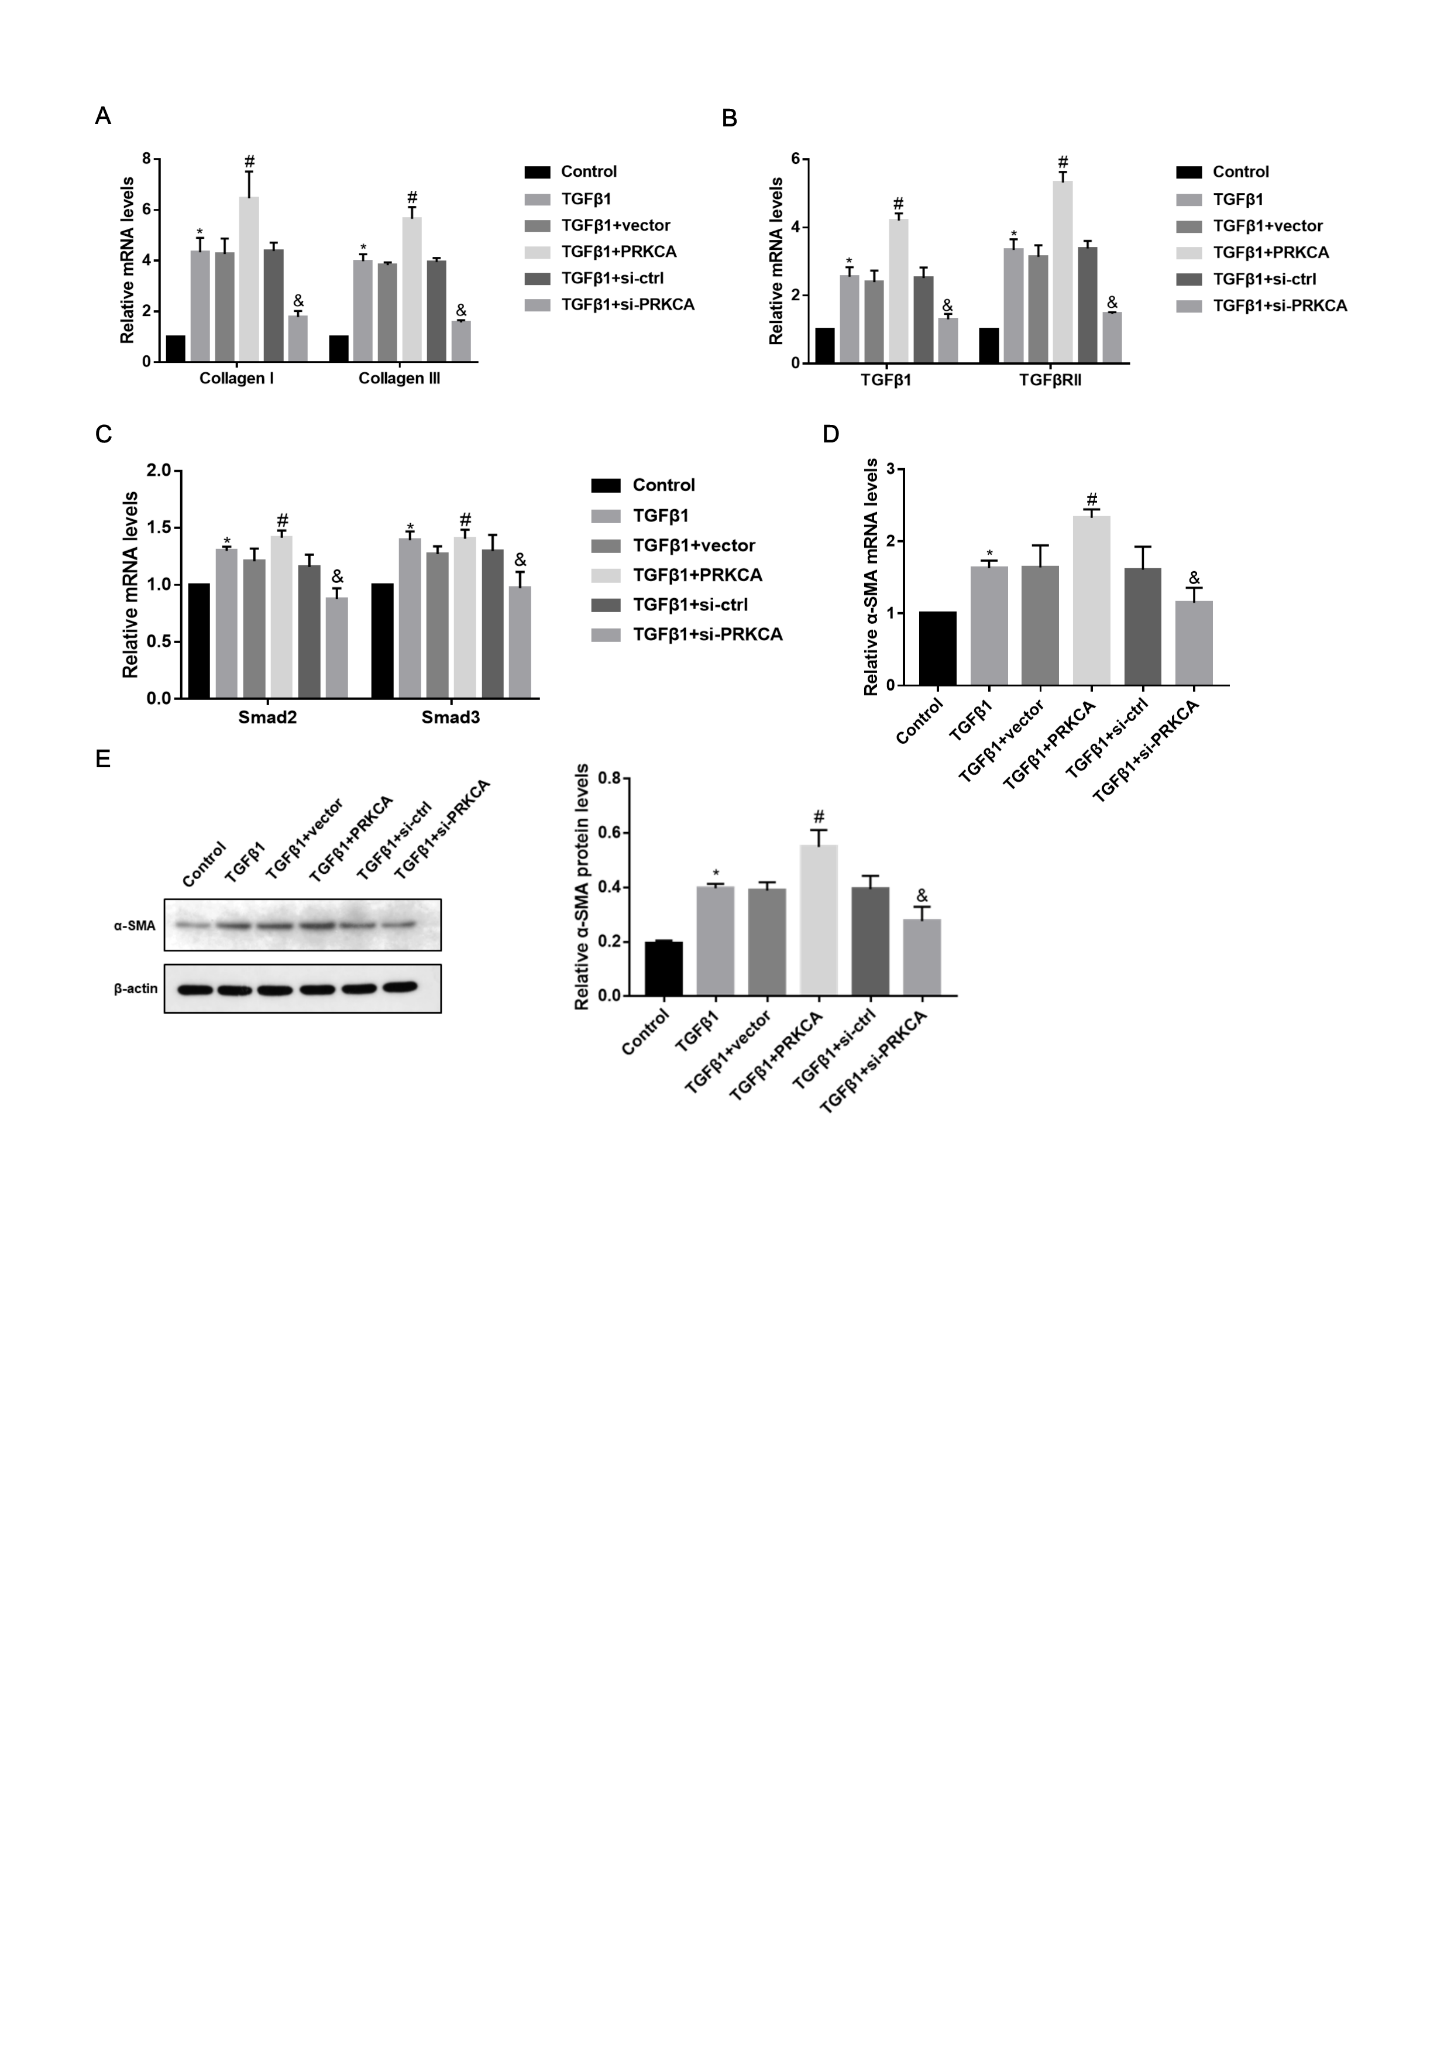


Supplementary Figure 8. Effects of PRKCA expression on the collagen production, TGFβ1/Smad signaling activation and α-SMA expression of TGFβ1-induced human atrial fibroblasts. (A) Results of the qPCR showed that PRKCA overexpression increased the collagen production, whereas PRKCA knockdown exerted the opposite effects. (B, C) Results of the qPCR showed that PRKCA overexpression facilitated the activation of TGFβ1/Smad signaling pathway, whereas PRKCA knockdown exerted the opposite effects. (D, E) Results of the qPCR and WB showed that PRKCA overexpression increased α-SMA expression, whereas PRKCA knockdown exerted the opposite effects. *P < 0.05 vs. control, #P < 0.05 vs. TGFβ1, &P < 0.05 vs. TGFβ1 + miR-647 + vector. Data were presented as mean ± SD.


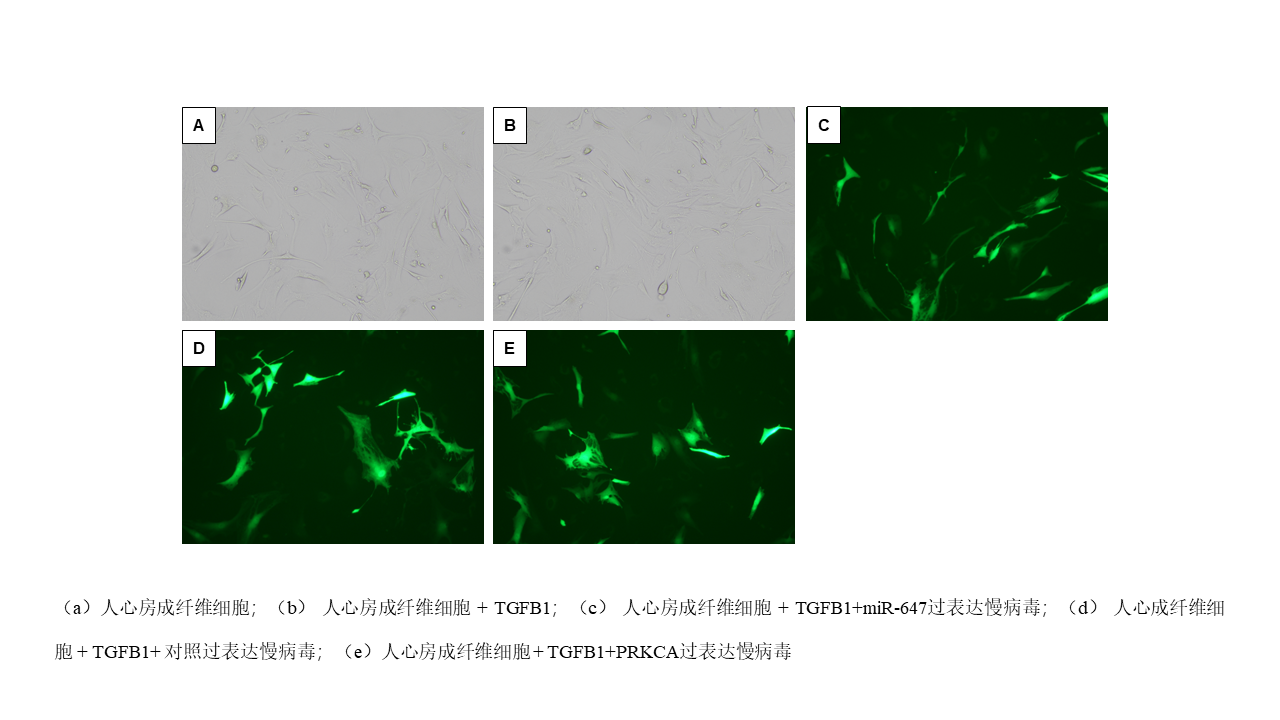


Supplementary Figure 9. Transfection of lentiviral particles of vector, PRKCA, si-ctrl, or si-PRKCA into the human atrial fibroblasts. (A) Control group, the human atrial fibroblasts, 100×. (B) The human atrial fibroblasts stimulated by TGFβ1, 100×. (C) The human atrial fibroblasts stimulated by TGFβ1, transfected with miR-647, 100×. (D) The human atrial fibroblasts stimulated by TGFβ1, transfected with miR-647 and vector, 100×. (E) The human atrial fibroblasts stimulated by TGFβ1, transfected with miR-647 and PRKCA, 100×. The lentiviruses carried green fluorescence protein.


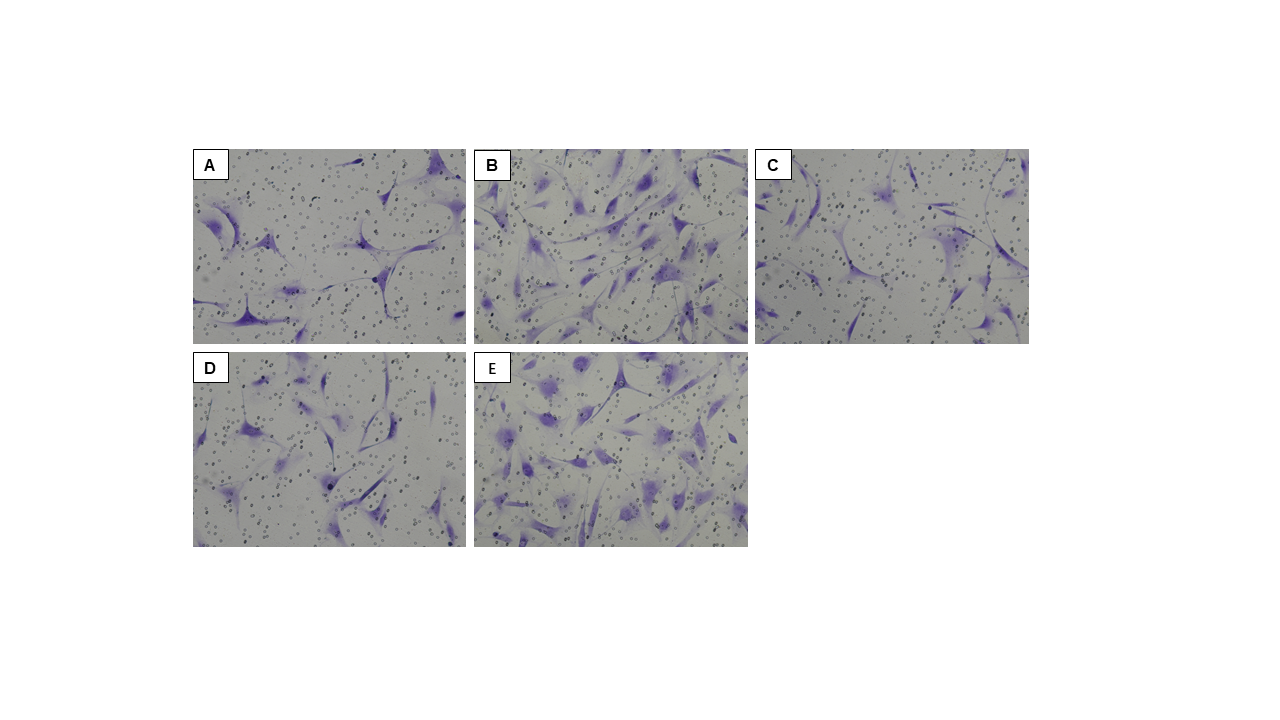


Supplementary Figure 10. Cell migration detected by transwell assay. (A) Control group, the human atrial fibroblasts, 100×. (B) The human atrial fibroblasts stimulated by TGFβ1, 100×. (C) The human atrial fibroblasts stimulated by TGFβ1, transfected with miR-647, 100×. (D) The human atrial fibroblasts stimulated by TGFβ1, transfected with miR-647 and vector, 100×. (E) The human atrial fibroblasts stimulated by TGFβ1, transfected with miR-647 and PRKCA, 100×. The cells were stained with crystal violet.


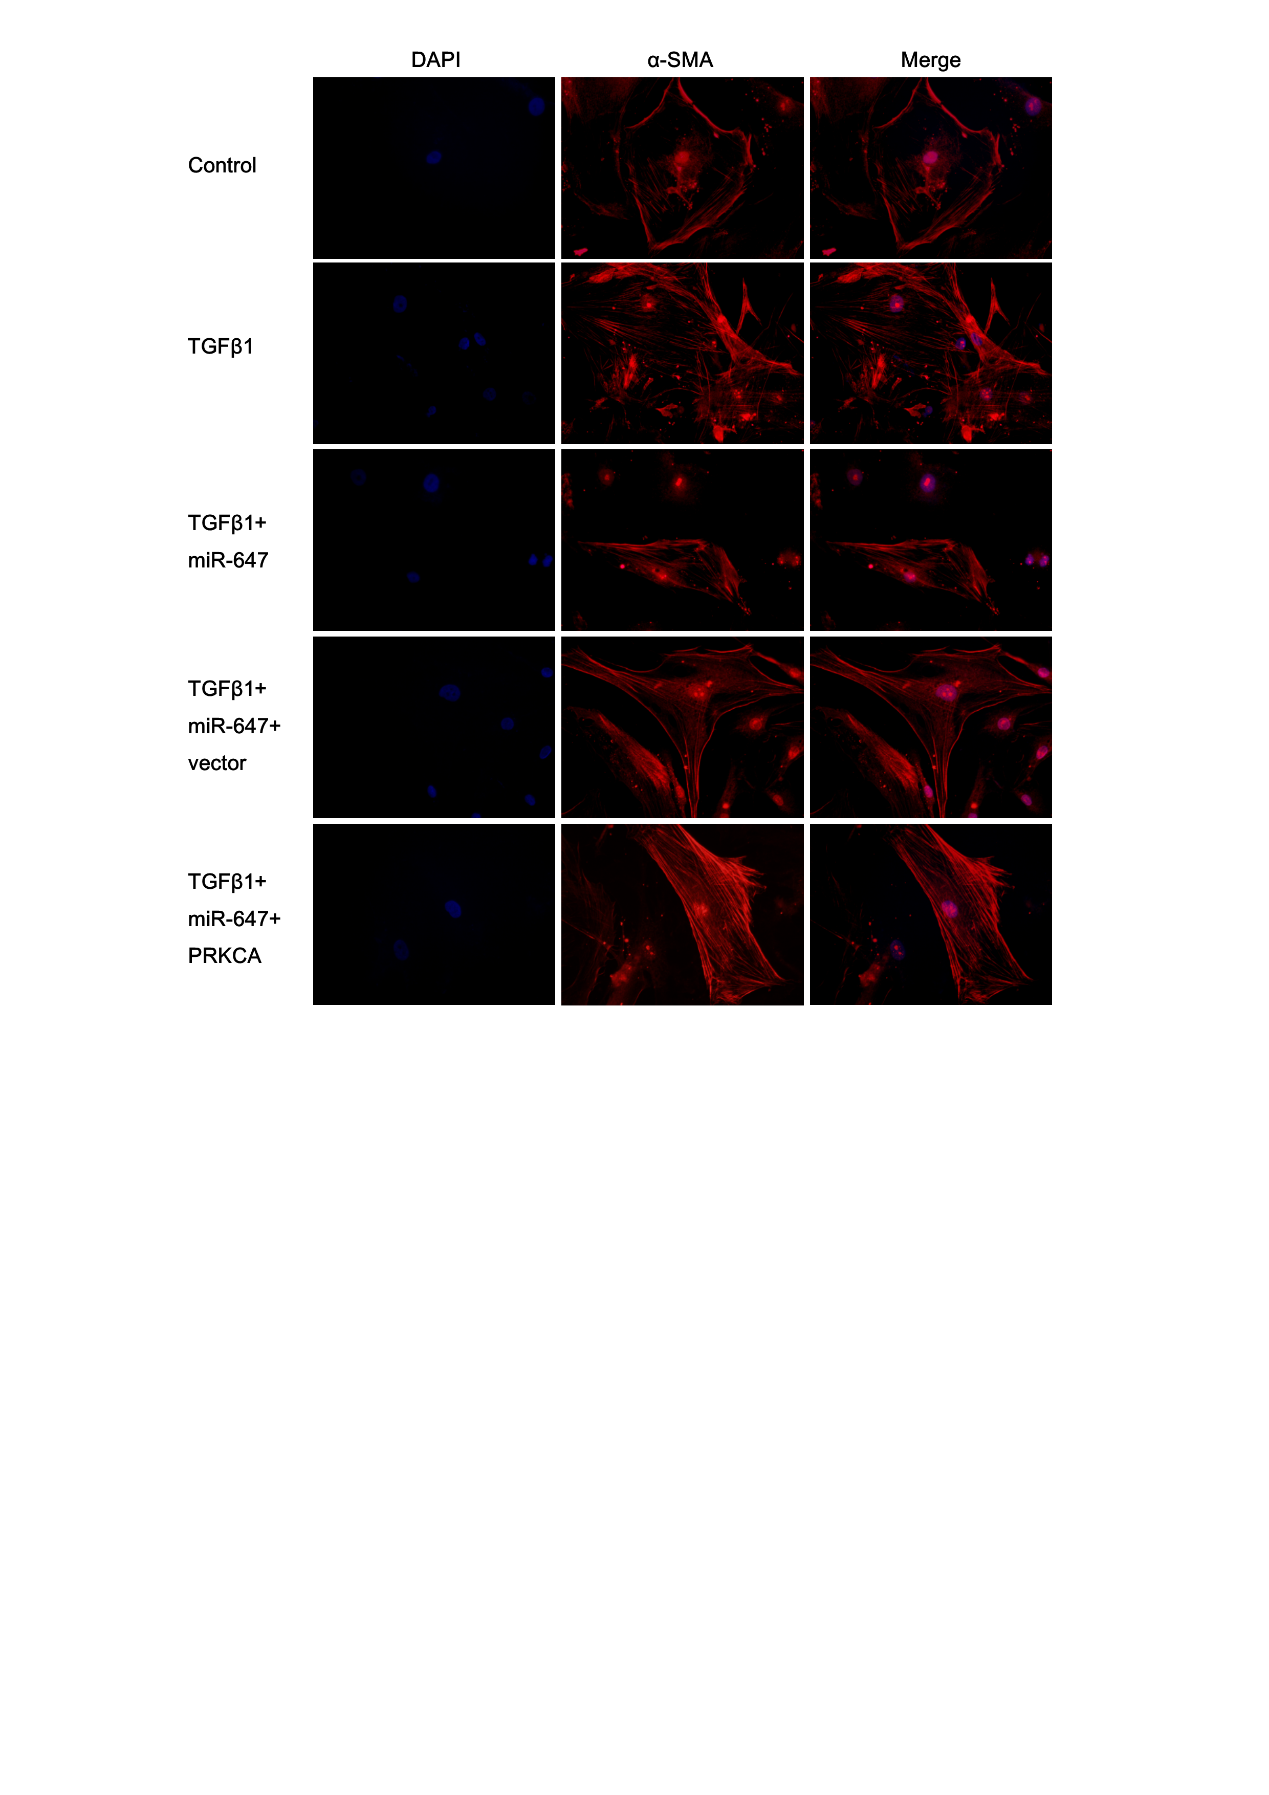


Supplementary Figure 11. Immunofluorescence staining of α-SMA (red) in human atrial fibroblasts, 400×. DAPI was used for nuclear counterstaining (blue).


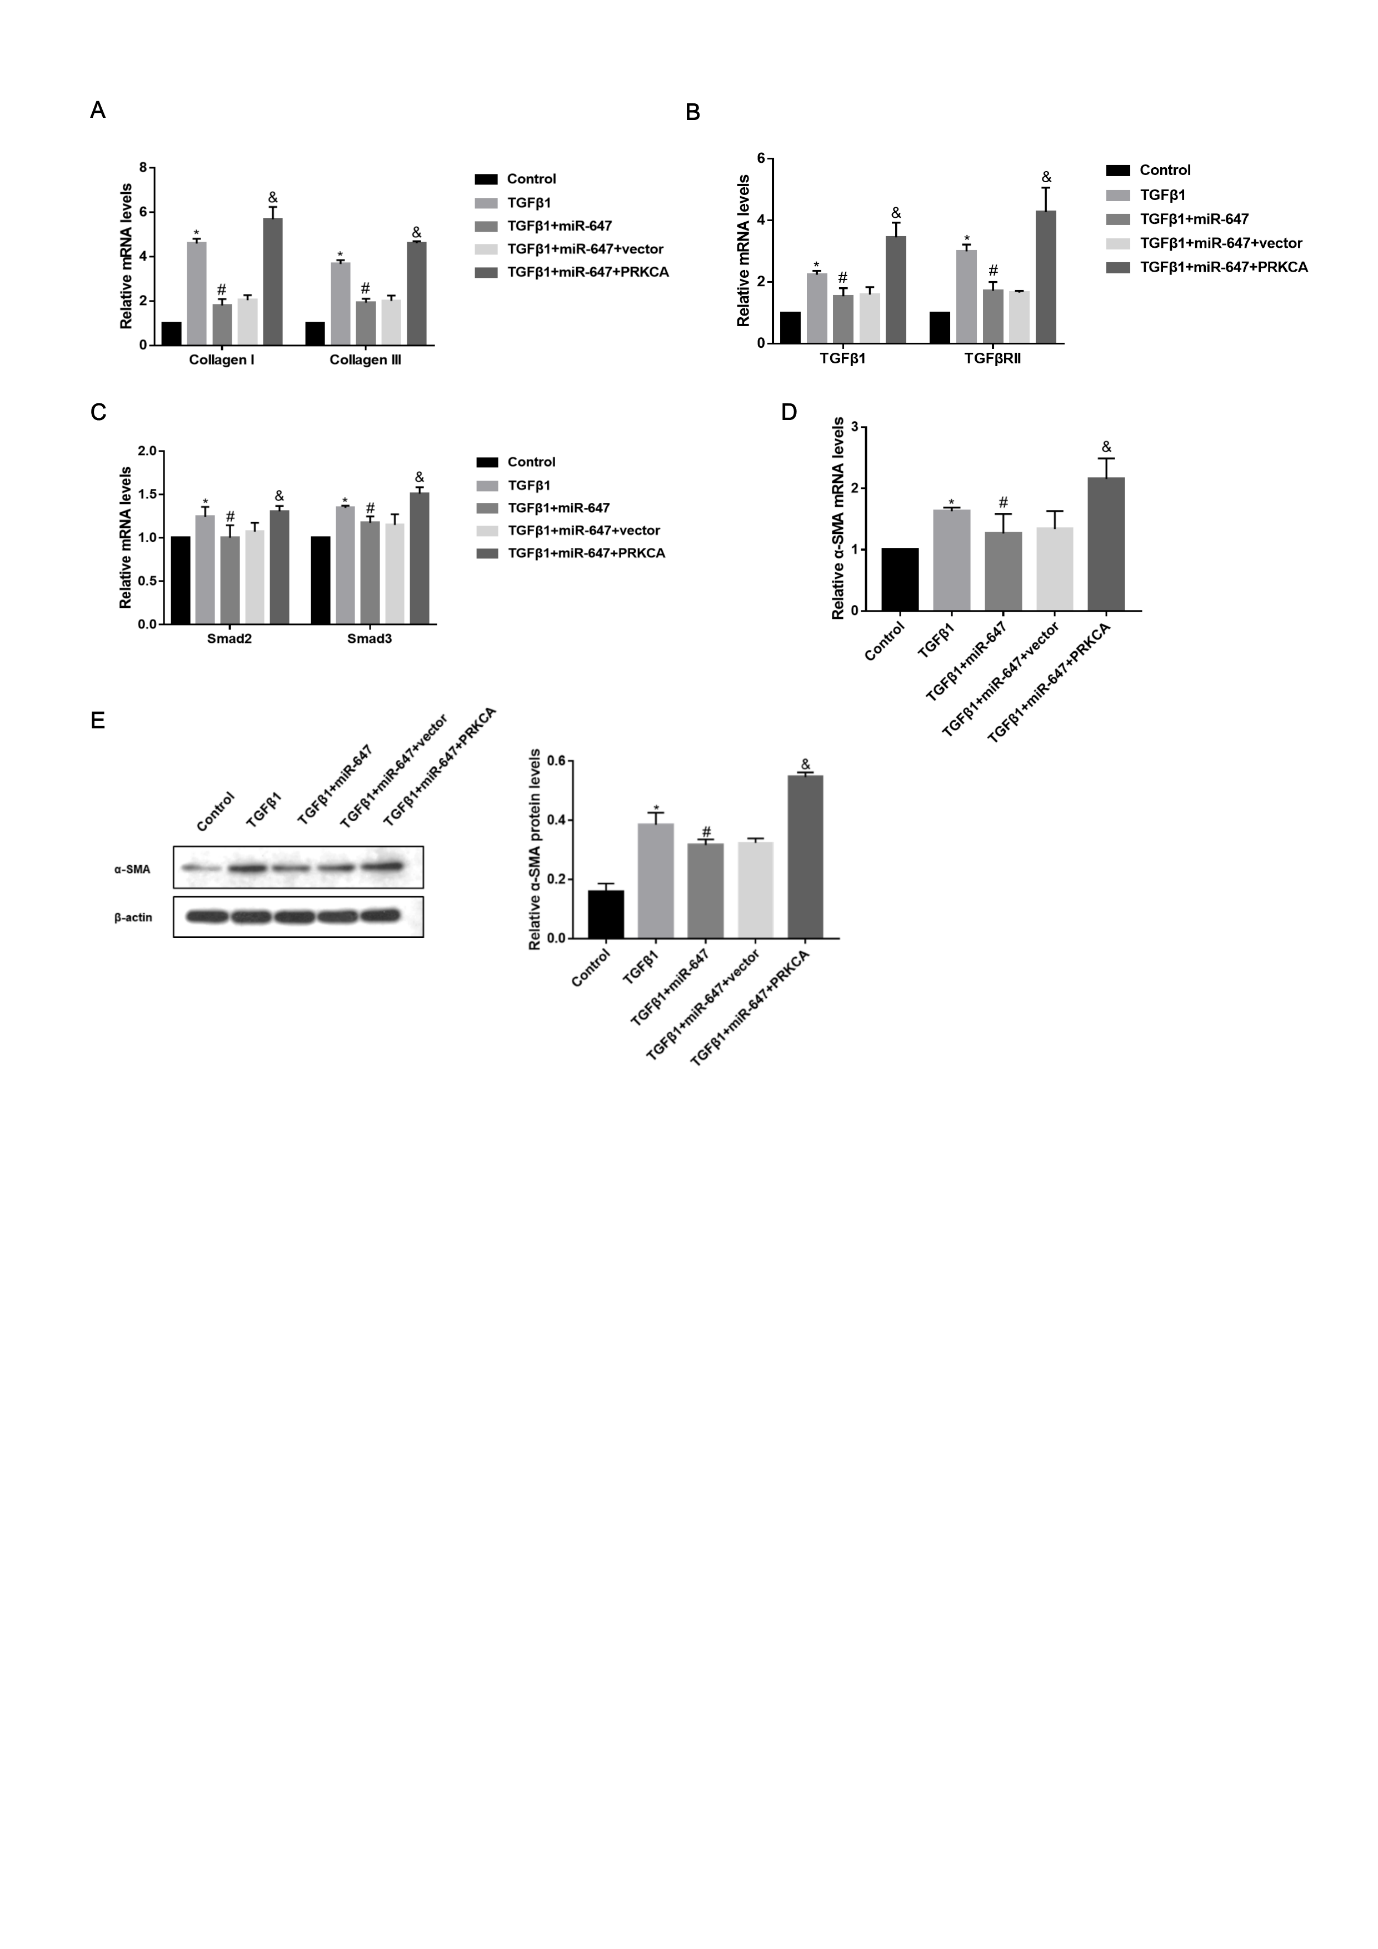


Supplementary Figure 12. Effects of miR-647 expression on the collagen production, TGFβ1/Smad signaling activation and α-SMA expression of TGFβ1-induced human atrial fibroblasts via PRKCA. (A) Results of the qPCR showed that miR-647 overexpression reduced collagen production, which was increased by PRKCA overexpression. (B, C) Results of the qPCR showed that PRKCA overexpression facilitated the activation of TGFβ1/Smad signaling pathway, whereas PRKCA knockdown exerted the opposite effects. (D, E) Results of the qPCR and WB showed that miR-647 overexpression inhibited the activation of TGFβ1/Smad signaling pathway, which was facilitated by PRKCA overexpression. *P < 0.05 vs. control, #P < 0.05 vs. TGFβ1, &P < 0.05 vs. TGFβ1 + miR-647 + vector. Data were presented as mean ± SD.
