# Supplementary material for: MiR-647 Targeting PRKCA to Regulate the Activation of Human Atrial Fibroblasts Through TGFβ1/Smad Pathway
Source: Research Square preprint supplement (doi:10.21203/rs.3.rs-1535469/v1), 2022-04-12
Supplement: Supplementary file 2 [file 6e232c0679606da594f06f41.docx]

Supplementary Table 1. miR-647 inhibited atrial fibroblasts proliferation

| Groups | Control | | TGFβ1 | | TGFβ1+mimic NC | |
| --- | --- | --- | --- | --- | --- | --- |
| OD value | RPR | OD value | RPR | OD value | RPR |
|  | 0.698±0.033 | 100% | 0.923±0.028 | 121% | 0.904±0.024 | 123% |
| Groups | TGFβ1+miR-647 mimic | | TGFβ1+inhibitor mimic | | TGFβ1+miR-647 mimic | |
| OD value | RPR | OD value | RPR | OD value | RPR |
|  | 0.678±0.031 | 102% | 0.901±0.025 | 124% | 1.008±0.032 | 137% |

OD: optical density, RPR: relative proliferative rate

Supplementary Table 2. PRKCA promoted atrial fibroblasts proliferation

| Groups | Control | | TGFβ1 | | TGFβ1+vector | |
| --- | --- | --- | --- | --- | --- | --- |
| OD value | RPR | OD value | RPR | OD value | RPR |
|  | 0.713±0.026 | 100% | 0.917±0.033 | 126% | 0.901±0.026 | 123% |
| Groups | TGFβ1+PRKCA | | TGFβ1+si-ctrl | | TGFβ1+si-PRKCA | |
| OD value | RPR | OD value | RPR | OD value | RPR |
|  | 1.001±0.030 | 137% | 0.903±0.023 | 124% | 0.777±0.022 | 106% |

OD: optical density, RPR: relative proliferative rate

Supplementary Table 3. miR-647 inhibited atrial fibroblasts proliferation via PRKCA

| Groups | Control | | | TGFβ1 | | | TGFβ1+miR-647 | |
| --- | --- | --- | --- | --- | --- | --- | --- | --- |
| OD value | | RPR | OD value | | RPR | OD value | RPR |
|  | 0.773±0.004 | | 100% | 0.960±0.027 | | 124% | 0.837±0.021 | 108% |
| Groups | TGFβ1+miR-647+vector | | | | TGFβ1+miR-647+PRKCA | |  | |
| OD value | RPR | | | OD value | RPR |  | |
|  | 0.844±0.032 | 109% | | | 0.979±0.026 | 127% |  | |

OD: optical density, RPR: relative proliferative rate
